# Supplementary material for: Emergence of metapopulations and echo chambers in mobile agents
Source: PubMed Central journal article supplement (PMC5004139; doi:10.1038/srep31834), 2016-08-30
Supplement: srep31834-s1.pdf [file srep31834-s1.pdf]

# Supplementary Information: Emergence of metapopulations and echo chambers in mobile agents

Michele Starnini<sup>1</sup>, Mattia Frasca<sup>2</sup>, and Andrea Baronchelli<sup>3</sup>

<sup>1</sup>Departament de Física Fonamental, Universitat de Barcelona, Martí i Franquès 1, 08028 Barcelona, Spain

<sup>2</sup>Dipartimento di Ingegneria Elettrica Elettronica e Informatica, University of Catania, Viale A. Doria 6, 95125 Catania, Italy

<sup>3</sup>Department of Mathematics, City University London, London EC1V 0HB, UK

## ABSTRACT

Supplementary Information for the manuscript *Emergence of metapopulations and echo chambers in mobile agents*

## Supplementary Information

**Movie S1** - Simulation of the model with  $N = 200$  individuals, parameters are set to:  $R = 10^{-4}$ ,  $K = 0.01$ ,  $\nu = 2$ ,  $p_c = 0.1$  and  $C = 0$ . Color codes for the status values.

**Movie S2** - Simulation of the model with  $N = 200$  individuals, parameters are set to  $R = 10^{-4}$ ,  $K = 0.01$ ,  $\nu = 2$ ,  $p_c = 5$  and  $C = 0$ . Color codes for the status values.

**Movie S3** - Simulation of the model with confirmation bias, with  $N = 200$  individuals, parameters are set to  $R = 10^{-4}$ ,  $K = 0.01$ ,  $\nu = 2$ ,  $p_c = 1$  and  $C = 0.6$ . Color codes for the status values.
